# Supplementary material
Source: Springer Nature journal article supplement (https://www.springermedizin.de/resource/supplementary/12885_2012_3806_MOESM2_ESM.pdf/9464368)

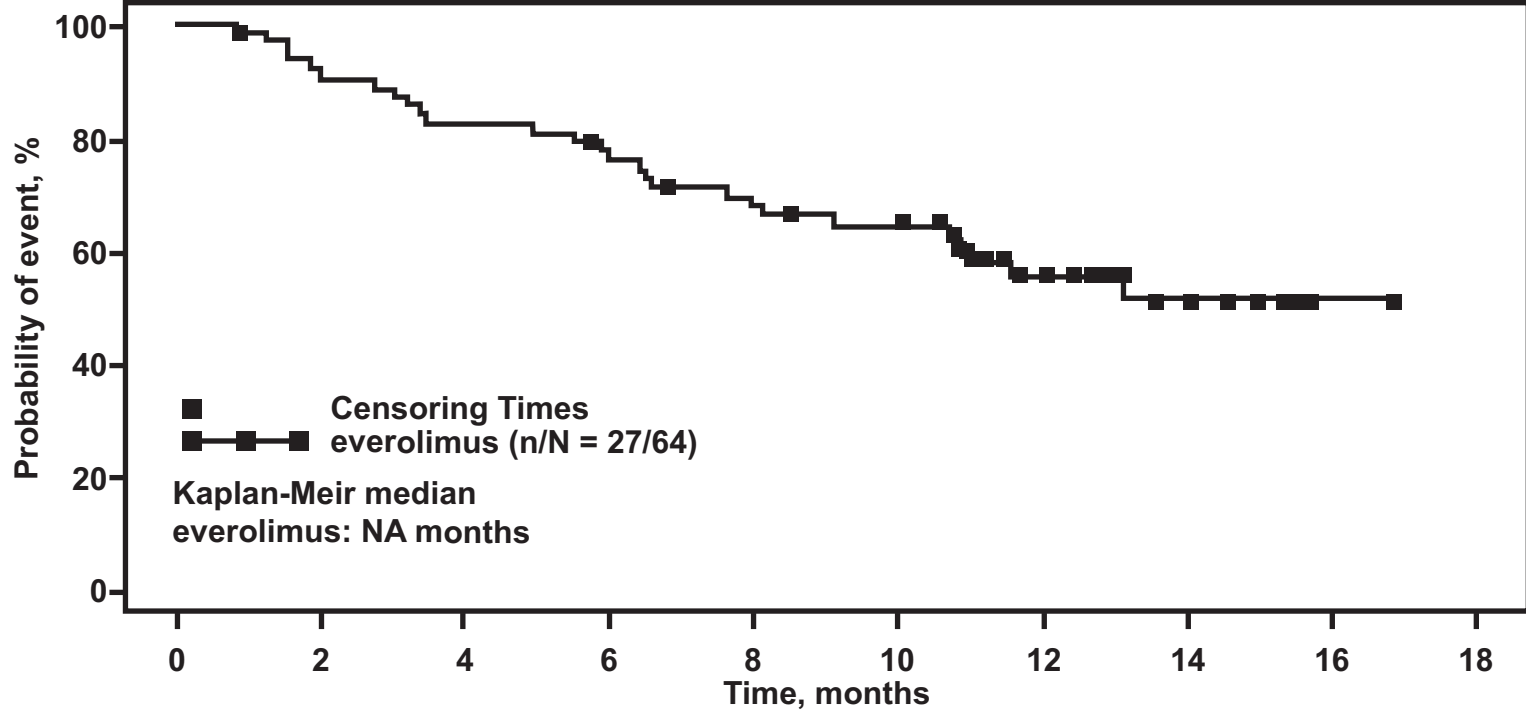

**No. of patients still at risk**

|            |    |    |    |    |    |    |    |   |   |   |
|------------|----|----|----|----|----|----|----|---|---|---|
| everolimus | 64 | 58 | 52 | 47 | 41 | 37 | 18 | 8 | 1 | 0 |
|------------|----|----|----|----|----|----|----|---|---|---|

Supplement: MOESM2 [file 9464368]
